# Supplementary material for: The Ectomycorrhizal Fungi and Soil Bacterial Communities of the Five Typical Tree Species in the Junzifeng National Nature Reserve, Southeast China
Source: MDPI journal article supplement (doi:10.3390/plants12223853), 2023-11-14
Supplement: s1 [file s1]

## Supplementary Files

### 1. Supplementary Tables

**Supplementary Table S1.** General information on the five typical forests in the reserve.

| Tree stand type | Latitude    | Longitude  | Altitude (m) | Tree composition             | Forest type    |
|-----------------|-------------|------------|--------------|------------------------------|----------------|
| PM              | 117°28'28"N | 26°21'39"E | 712          | <i>Pinus massoniana</i>      | Natural forest |
| CC              | 117°28'26"N | 26°21'39"E | 766          | <i>Castanopsis carlesii</i>  | Natural forest |
| CE              | 117°29'32"N | 26°20'44"E | 766          | <i>Castanopsis eyrei</i>     | Natural forest |
| CF              | 117°29'24"N | 26°20'59"E | 753          | <i>Castanopsis fargesii</i>  | Natural forest |
| KC              | 117°28'27"N | 26°21'48"E | 783          | <i>Keteleeria cyclolepis</i> | Natural forest |

*Pinus massoniana* (PM), *Castanopsis carlesii* (CC), *Castanopsis eyrei* (CE), *Castanopsis fargesii* (CF), *Keteleeria cyclolepis* (KC).

**Supplementary Table S2.** Soil properties of five tree species.

| Forest type | pH         | SOM<br>(g·kg <sup>-1</sup> ) | TP<br>(g·kg <sup>-1</sup> ) | TK<br>(g·kg <sup>-1</sup> ) | TOC<br>(g·kg <sup>-1</sup> ) | DTN<br>(g·kg <sup>-1</sup> ) |
|-------------|------------|------------------------------|-----------------------------|-----------------------------|------------------------------|------------------------------|
| PM          | 3.61±0.13c | 58.74±1.57a                  | 0.28±0.02b                  | 9.6±0.75c                   | 1±0.02a                      | 0.09±0.01c                   |
| CC          | 4.23±0.13a | 51.74±0.85b                  | 0.11±0.02c                  | 14.39±1.38b                 | 0.73±0.09bc                  | 0.11±0.02c                   |
| CE          | 3.45±0.12c | 51.59±1.1b                   | 0.43±0.03a                  | 8.19±0.46c                  | 0.66±0.13bc                  | 0.21±0.03a                   |
| CF          | 4.29±0.03a | 50.98±2.1b                   | 0.16±0.03c                  | 30.59±1.17a                 | 0.57±0.05c                   | 0.1±0.01c                    |
| KC          | 3.84±0.05b | 56.91±1.18a                  | 0.45±0.02a                  | 8.17±0.42c                  | 0.87±0.18ab                  | 0.16±0.03b                   |

Soil potential hydrogen (pH), soil organic matter (SOM), total phosphorus (TP), total potassium (TK), dissolved organic carbon (DOC), dissolved organic nitrogen (DON); *Pinus massoniana* (PM), *Castanopsis carlesii* (CC), *Castanopsis eyrei* (CE), *Castanopsis fargesii* (CF), *Keteleeria cyclolepis* (KC); different letters indicate significant differences ( $P < 0.05$ ) among five forests based on a one-way ANOVA followed by Tukey test.

**Supplementary Table S3.** Identities of ectomycorrhizal fungi based on the DNA sequence BLAST results of the five tree species.

| No. | Taxonomy                                   | GenBank<br>Accession Number | Sequence<br>length (bp) | Closest GenBank match                        | % Match |
|-----|--------------------------------------------|-----------------------------|-------------------------|----------------------------------------------|---------|
| 1   | <i>Amanita</i><br><i>pseudosynopyramis</i> | OR258991                    | 637                     | <i>Amanita pseudosynopyramis</i><br>OM510279 | 100     |
| 2   | <i>Cenococcum geophilum</i>                | OR258990                    | 447                     | <i>Cenococcum geophilum</i> LC095091         | 100     |
| 3   | <i>Cortinarius carneoroseus</i>            | OR259001                    | 490                     | <i>Cortinarius carneoroseus</i> OP339601     | 97.2    |
| 4   | Cortinariaceae sp. I                       | OR258999                    | 579                     | <i>Cortinarius triangulus</i> NR171373       | 89.18   |
| 5   | Cortinariaceae sp. II                      | OR259000                    | 558                     | <i>Cortinarius ochrophyllus</i> OM001518     | 86.63   |
| 6   | <i>Hortiboletus rubellus</i>               | OR259007                    | 583                     | <i>Boletus rubellus</i> voucher GQ166883     | 98.46   |
| 7   | Helotiales sp.                             | OR259005                    | 487                     | Helotiales sp. LC218312                      | 100     |

|    |                                 |          |     |                          |                  |       |
|----|---------------------------------|----------|-----|--------------------------|------------------|-------|
| 8  | <i>Inocybe posterula</i>        | OR258998 | 780 | Inocybe posterula        | HQ604298         | 99.74 |
| 9  | <i>Lactarius atrofuscus</i>     | OR259002 | 522 | Lactarius atrofuscus     | MK351919         | 97.75 |
| 10 | <i>Lactarius vividus</i>        | OR259003 | 578 | Lactarius vividus        | voucher MT568545 | 97.46 |
| 11 | <i>Russula aff. kansaiensis</i> | OR258996 | 630 | Russula aff. kansaiensis | 2C7<br>AB973773  | 97.75 |
| 12 | <i>Russula compacta</i>         | OR258994 | 501 | Russula compacta         | MK430040         | 99.40 |
| 13 | <i>Russula xerampelina</i>      | OR258995 | 540 | Russula xerampelina      | MW517291         | 100   |
| 14 | <i>Russula</i> sp.              | OR258997 | 537 | <i>Russula</i> sp.       | EF627043         | 98.70 |
| 15 | <i>Sebacina</i> sp.             | OR259006 | 605 | uncultured Sebacina      | MF405785         | 99.83 |
| 16 | <i>Tomentella</i> sp.           | OR258993 | 610 | uncultured Tomentella    | GQ240905         | 98.69 |
| 17 | Trichocomaceae sp.              | OR258992 | 517 | Trichocomaceae sp.       | JX243820         | 93.67 |
| 18 | Thelephoraceae sp.              | OR259004 | 704 | Thelephoraceae sp.       | MT522580         | 98.90 |

**Supplementary Table S4.** Sorensen (bottom left) and Jaccard similarity index (top right) of EMF in five tree species.

| Tree species | Similarity index |             |      |             |      |
|--------------|------------------|-------------|------|-------------|------|
|              | PM               | CC          | CE   | CF          | KC   |
| PM           |                  | 0.12        | 0.17 | 0.17        | 0.10 |
| CC           | 0.27             |             | 0.07 | <b>0.19</b> | 0.08 |
| CE           | 0.40             | 0.15        |      | 0.11        | 0    |
| CF           | 0.40             | <b>0.46</b> | 0.25 |             | 0.13 |
| KC           | 0.22             | 0.17        | 0    | 0.29        |      |

**Supplementary Table S5.** Relative frequency (RF), relative abundance (RA), and importance value (IV) of ECM fungi in the five tree species at the species levels.

| Identification                     | Relative frequency (RF) |       |       |       |    | Relative abundance (RA) |       |       |       |       | Importance value (IV) |       |       |       |       |
|------------------------------------|-------------------------|-------|-------|-------|----|-------------------------|-------|-------|-------|-------|-----------------------|-------|-------|-------|-------|
|                                    | PM                      | CC    | CE    | CF    | KC | PM                      | CC    | CE    | CF    | KC    | PM                    | CC    | CE    | CF    | KC    |
| <i>Amanita pseudosychnopyramis</i> | -                       | 7.14  | -     | -     | -  | -                       | 1.23  | -     | -     | -     | -                     | 4.19  | -     | -     | -     |
| <i>Cenococcum geophilum</i>        | 36.36                   | 21.43 | -     | 33.33 | 40 | 13.03                   | 26.72 | -     | 34.24 | 66.97 | 24.7                  | 24.08 | -     | 33.79 | 53.48 |
| <i>Cortinarius carneoroseus</i>    | -                       | -     | 22.22 | -     | -  | -                       | -     | 1.41  | -     | -     | -                     | -     | 11.82 | -     | -     |
| Cortinariaceae sp. I               | -                       | 7.14  | -     | 33.33 | -  | -                       | 4.93  | -     | 3.2   | -     | -                     | 6.03  | -     | 18.27 | -     |
| Cortinariaceae sp. II              | 9.09                    | 21.43 | 44.44 | 8.33  | -  | 22.41                   | 47.17 | 87.44 | 2.33  | -     | 15.75                 | 34.3  | 65.94 | 5.33  | -     |
| <i>Hortiboletus rubellus</i>       | -                       | 14.29 | -     | -     | -  | -                       | 6.16  | -     | -     | -     | -                     | 10.22 | -     | -     | -     |
| Helotiales sp.                     | -                       | 7.14  | -     | -     | -  | -                       | 1.23  | -     | -     | -     | -                     | 4.19  | -     | -     | -     |
| <i>Inocybe posterula</i>           | 9.09                    | -     | -     | -     | -  | 29.06                   | -     | -     | -     | -     | 19.08                 | -     | -     | -     | -     |
| <i>Lactarius atrofuscus</i>        | 9.09                    | -     | 11.11 | -     | -  | 8.02                    | -     | 9.73  | -     | -     | 8.55                  | -     | 10.42 | -     | -     |
| <i>Lactarius vividus</i>           | 27.27                   | -     | -     | -     | -  | 12.53                   | -     | -     | -     | -     | 19.9                  | -     | -     | -     | -     |

|                                 |      |      |       |    |    |       |      |      |       |       |       |      |       |       |       |
|---------------------------------|------|------|-------|----|----|-------|------|------|-------|-------|-------|------|-------|-------|-------|
| <i>Russula aff. kansaiensis</i> | -    | 7.14 | -     | -  | -  | -     | 3.69 | -    | -     | -     | -     | 5.42 | -     | -     | -     |
| <i>Russula compacta</i>         | -    | -    | -     | -  | 20 | -     | -    | -    | -     | 4.58  | -     | -    | -     | -     | 12.29 |
| <i>Russula xerampelina</i>      | -    | -    | -     | 25 | -  | -     | -    | -    | 60.23 | -     | -     | -    | -     | 42.61 | -     |
| <i>Russula</i> sp.              | -    | 7.14 | -     | -  | -  | -     | 2.46 | -    | -     | -     | -     | 4.8  | -     | -     | -     |
| <i>Sebacina</i> sp.             | -    | -    | 22.22 | -  | -  | -     | -    | 1.41 | -     | -     | -     | -    | 11.82 | -     | -     |
| <i>Tomentella</i> sp.           | -    | -    | -     | -  | 40 | -     | -    | -    | -     | 28.45 | -     | -    | -     | -     | 34.22 |
| Trichocomaceae sp.              | -    | 7.14 | -     | -  | -  | -     | 6.4  | -    | -     | -     | -     | 6.77 | -     | -     | -     |
| Thelephoraceae sp.              | 9.09 | -    | -     | -  | -  | 14.96 | -    | -    | -     | -     | 12.03 | -    | -     | -     | -     |

*Pinus massoniana* (PM), *Castanopsis carlesii* (CC), *Castanopsis eyrei* (CE), *Castanopsis fargesii* (CF), *Keteleeria cyclolepis* (KC); bold values indicate relative frequency, relative abundance, and importance value of ECM fungi at the genus level; unbold values indicate relative frequency, relative abundance, and importance value of ECM fungi at the species level; “–” stands for absence.

**Supplementary Table S6.** Relative abundance of the dominant bacterial phyla (>1%).

| Samples | Proteobacteria (%) | Acidobacteria(%) | Actinobacteria (%) | WPS-2 (%)   | Chloroflexi (%) |
|---------|--------------------|------------------|--------------------|-------------|-----------------|
| PM      | 16.16±2.0b         | 21.47±2.06ab     | 9.06±9.06a         | 3.75±1.92ab | 1.21±0.41b      |
| CC      | 19.82±1.74ab       | 20.09±3.42ab     | 8.68±8.68a         | 1.38±0.43bc | 1.86±0.67ab     |
| CE      | 19.4±4.49ab        | 19.93±2.0ab      | 8.68±8.68a         | 5.29±1.51a  | 2.88±0.74a      |
| CF      | 23.17±1.71a        | 23.75±1.2a       | 8.6±8.60a          | 0.87±0.46c  | 2.37±0.38a      |
| KC      | 21.72±2.46ab       | 18.26±2.32b      | 9.75±9.75a         | 1.47±0.35bc | 1±0.21b         |

Values are means ± standard deviation (n = 4). *Pinus massoniana* (PM), *Castanopsis carlesii* (CC), *Castanopsis eyrei* (CE), *Castanopsis fargesii* (CF), *Keteleeria cyclolepis* (KC); different letters indicate significant differences (P < 0.05) among forest types based on a one-way ANOVA followed by Tukey test.

**Supplementary Table S7.** Relative abundance of the bacterial genus (>1%).

| Samples | <i>Acidothermus</i> (%) | <i>Bradyrhizobiu</i> m (%) | <i>Acidibacter</i> (%) | <i>Candidatus_ Solibacter</i> (%) | <i>Candidatus_ Koribacter</i> (%) | <i>Roseiarcus</i> (%) | <i>Bryobacter</i> (%) |
|---------|-------------------------|----------------------------|------------------------|-----------------------------------|-----------------------------------|-----------------------|-----------------------|
| PM      | 6.94±0.29a              | 2.82±0.2b                  | 3.65±0.57a             | 3.24±0.28b                        | 1.57±0.35a                        | 2.51±0.31a            | 2.6±0.18a             |
| CC      | 5.31±0.5b               | 5.58±1.11a                 | 3.34±0.63a             | 3.96±0.18ab                       | 4.32±1.42a                        | 1.65±0.24a            | 1.81±0.09a            |
| CE      | 6.03±0.15ab             | 3.2±0.53ab                 | 4.49±1.13a             | 3.51±0.14ab                       | 2.64±0.47a                        | 2.67±0.24a            | 2.07±0.25a            |
| CF      | 3.53±0.17c              | 5.35±0.27ab                | 3.87±1a                | 4.5±0.25a                         | 4.72±0.5a                         | 2.14±0.22a            | 2.05±0.1a             |
| KC      | 7.43±0.37a              | 5.11±0.58ab                | 4.97±0.77a             | 3.81±0.14ab                       | 3.91±0.75a                        | 2.12±0.3a             | 2.33±0.27a            |

Values are means ± standard deviation (n = 4). *Pinus massoniana* (PM), *Castanopsis carlesii* (CC), *Castanopsis eyrei* (CE), *Castanopsis fargesii* (CF), *Keteleeria cyclolepis* (KC); different letters indicate significant differences (P < 0.05) among forest types based on a one-way ANOVA followed by Tukey test.

**Supplementary Table S8.** Relationship of soil properties with RDA1 and RDA2 from the RDA analysis.

|           |                | pH            | SOM          | TP            | TK            | DOC          | DON          |
|-----------|----------------|---------------|--------------|---------------|---------------|--------------|--------------|
| ECM fungi | RDA1           | 0.4696        | 0.5477       | 0.0836        | 0.5812        | 0.3162       | -0.6553      |
|           | RDA2           | -0.8829       | 0.8367       | 0.9965        | -0.8138       | 0.9487       | 0.7553       |
|           | R <sup>2</sup> | 0.7271        | 0.2445       | 0.6601        | 0.295         | 0.0793       | 0.4552       |
|           | p              | <b>0.0005</b> | 0.088        | <b>0.001</b>  | <b>0.0495</b> | 0.5072       | <b>0.007</b> |
| bacteria  | RDA1           | 0.6017        | -0.8684      | -0.5809       | 0.9549        | -0.8223      | -0.7883      |
|           | RDA2           | 0.7987        | -0.4959      | -0.814        | 0.2969        | -0.5691      | -0.6153      |
|           | R <sup>2</sup> | 0.7432        | 0.3084       | 0.6292        | 0.9368        | 0.4582       | 0.2619       |
|           | p              | <b>0.0005</b> | <b>0.048</b> | <b>0.0005</b> | <b>0.0005</b> | <b>0.002</b> | 0.0605       |

Soil potential hydrogen (pH), organic matter (SOM), total phosphorus (TP), total potassium (TK), dissolved organic carbon (DOC), dissolved origin nitrogen (DON); Numbers in bold indicate significance at the p < 0.05 level.

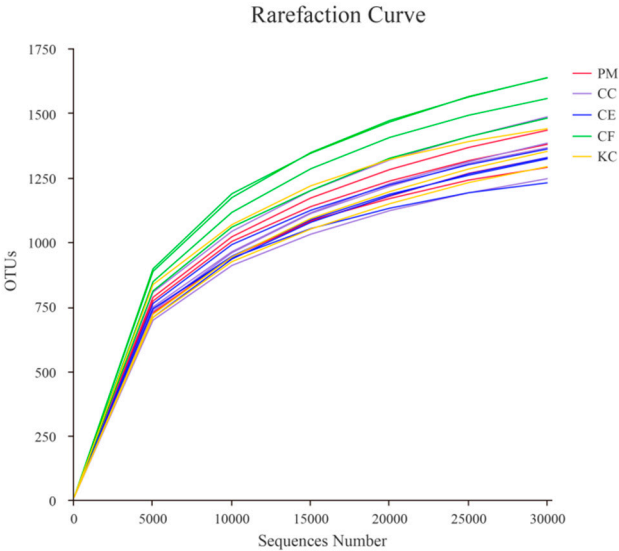

## 2. Supplementary Figures

**Supplementary Figure S1.** Bacterial community dilution curve of soil sample. The Alpha diversity index was used as the ordinate to draw the curve, and whether the volume of sequencing data was sufficient was assessed according to whether the curve was flat. *Pinus massoniana* (PM), *Castanopsis carlesii* (CC), *Castanopsis eyrei* (CE), *Castanopsis fargesii* (CF), *Keteleeria cyclolepis* (KC).

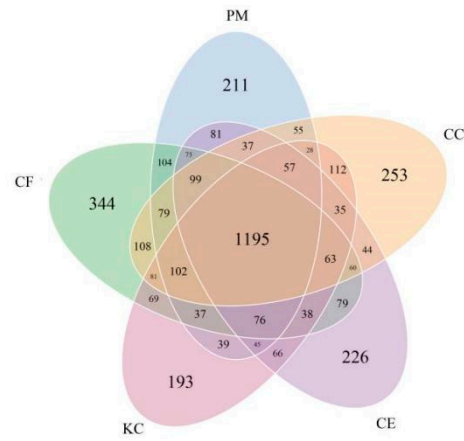

**Supplementary Figure S2.** Venn diagrams of OTU richness for PM, CC, CE, CF, and KC. *Pinus massoniana* (PM), *Castanopsis carlesii* (CC), *Castanopsis eyrei* (CE), *Castanopsis fargesii* (CF), *Keteleeria cyclolepis* (KC).
